# Supplementary material for: Microfluidic affinity separation chip for selective capture and release of label-free ovarian cancer exosomes
Source: Royal Society of Chemistry journal article supplement (doi:10.1039/c8lc00834e), 2018-01-01
Supplement: c8lc00834e1.pdf [file c8lc00834e1.pdf]

### Antibody Concentration Optimization – EpCAM+ Exosomes

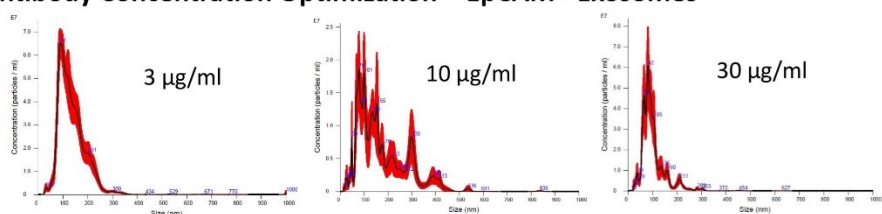

### Grooves vs Smooth

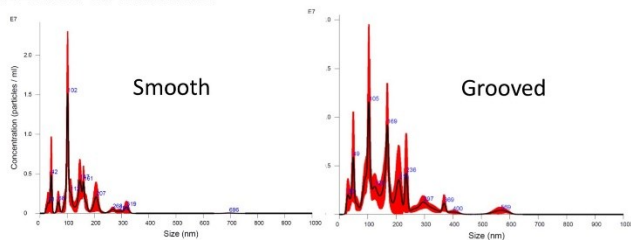

### Total Exosomes Isolated with ExoQuick

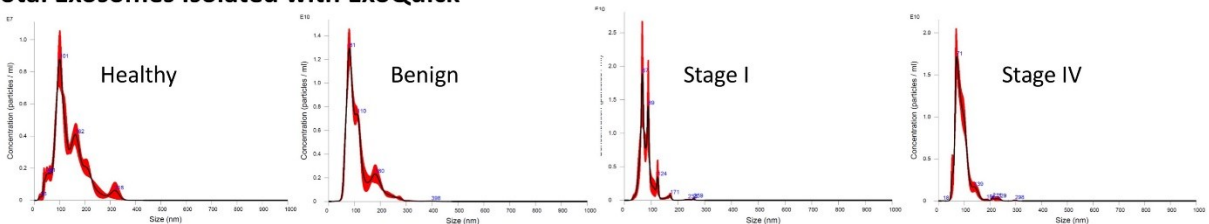

Figure S1.

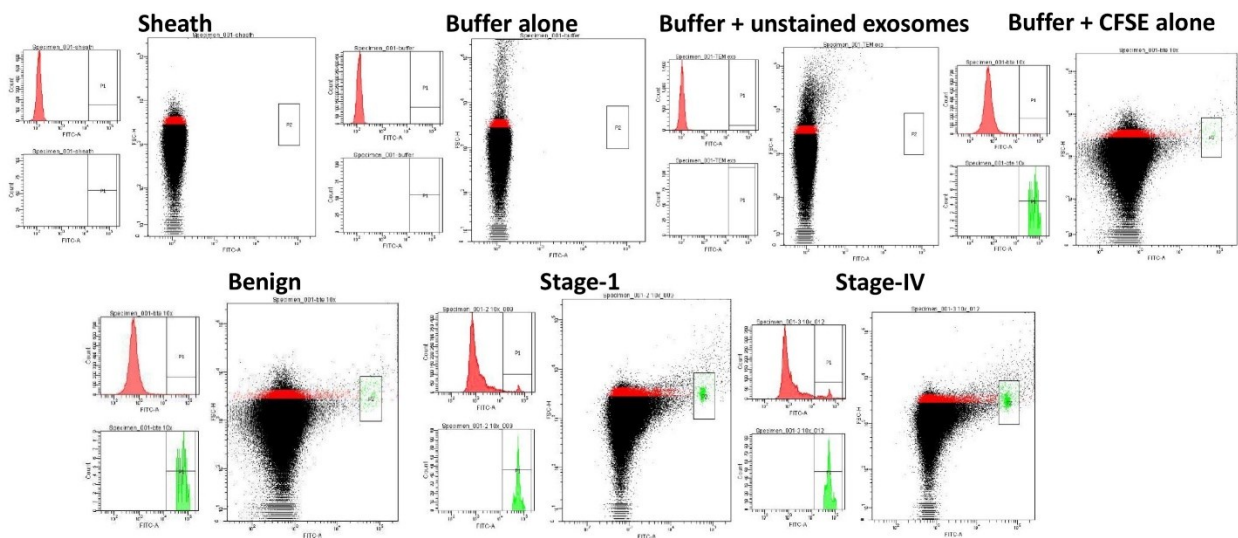

Figure S2.

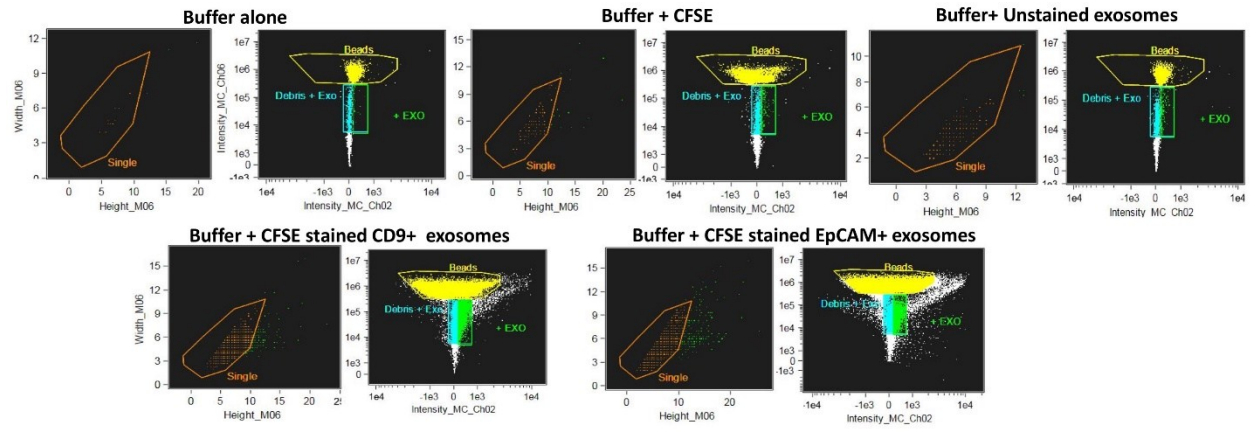

Figure S3.

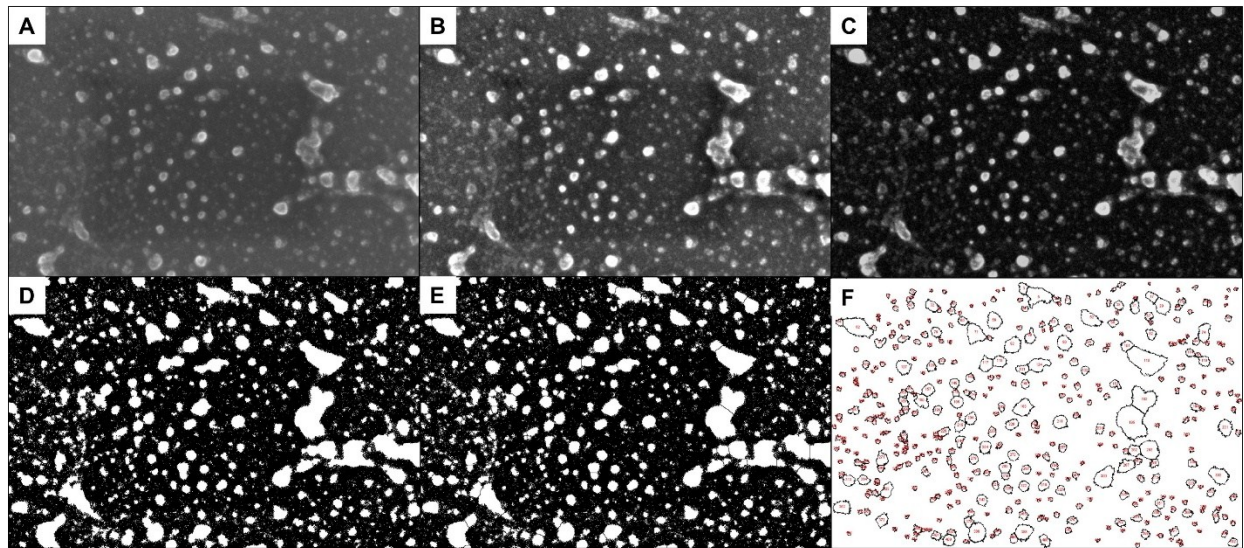

Figure S4.
